# Supplementary material for: Replicative Senescence in Vascular Smooth Muscle Cells: PURPL and NEAT1 Long Non-Coding RNAs as New Senescence-Associated Biomarkers
Source: Preprints.org preprint supplement (doi:10.20944/preprints202307.1589.v1), 2023-07-24
Supplement: Supplementary file 2 [file Supp Table 1_final.xlsx]

## Sheet: Supp.table1
Suppl Table 1.	Bioformatic annotations of selected protein coding genes
Gene Symbol	Entrez Gene	ENSG ID	Gene Name	Function/Mechanism of action	Genomics. Senescence	REACTOME
CDKN1A	1026	ENSG00000124762	cyclin dependent kinase inhibitor 1A	mediates the p53-dependent cell cycle G1 phase arrest in response to stress stimuli. It's a regulator of cell cycle progression at G1	https://genomics.senescence.info/cells/gene.php?gene_name=CDKN1A	REAC:R-HSA-2559583; REAC:R-HSA-1280215;REAC:R-HSA-2559582;REAC:R-HSA-6791312
CDKN2A	1029	ENSG00000147889	cyclin dependent kinase inhibitor 2A	tumor suppressor inducin arrest in G1-G2 phases	https://genomics.senescence.info/cells/gene.php?gene_name=CDKN2A	REAC:R-HSA-1280215;REAC:R-HSA-2559582
CXCL8/IL8	3576	ENSG00000169429	C-X-C motif chemokine ligand 8	secreted by mononuclear macrophages, neutrophils, eosinophils, T lymphocytes, epithelial cells, and fibroblasts.	https://genomics.senescence.info/longevity/gene.php?id=CXCL8	REAC:R-HSA-2559583;REAC:R-HSA-2559582
HMGB1	3146	ENSG00000189403	high mobility group box 1	DNA chaperone involved in replication, transcription, chromatin remodeling, V(D)J recombination, DNA repair and genome stability	https://genomics.senescence.info/genes/entry.php?hgnc=HMGB1	REAC:R-HSA-1280215
IL1B	3553	ENSG00000125538	interleukin 1 beta	immune response	https://genomics.senescence.info/longevity/search.php?search=IL1b	REAC:R-HSA-1280215
IL6	3569	ENSG00000136244	interleukin 6	inflammation and the maturation of B cells	https://genomics.senescence.info/cells/gene.php?gene_name=IL6	REAC:R-HSA-2559583 ;REAC:R-HSA-1280215;REAC:R-HSA-2559582
LMNB1	4001	ENSG00000113368	lamin B1	component of the nuclear lamina	https://genomics.senescence.info/cells/gene.php?gene_name=LMNB1	REAC:R-HSA-2559583 ;REAC:R-HSA-1280215
MMP3	4314	ENSG00000149968	matrix metallopeptidase 3	breakdown of extracellular matrix in normal physiological processes	https://genomics.senescence.info/longevity/gene.php?id=MMP3	REAC:R-HSA-1280215
PCNA	5111	ENSG00000132646	proliferating cell nuclear antigen	helps increase the processivity of leading strand synthesis during DNA replication	https://genomics.senescence.info/genes/entry.php?hgnc=PCNA	REAC:R-HSA-6791312
RRAD	6236	ENSG00000166592	Ras related glycolysis inhibitor and calcium channel regulator	GTP binding activity and calcium channel regulator activity.	https://genomics.senescence.info/cells/gene.php?gene_name=RRAD
TP53	7157	ENSG00000141510	tumor protein p53	tumor suppressor protein	https://genomics.senescence.info/cells/gene.php?gene_name=TP53	REAC:R-HSA-2559583; REAC:R-HSA-1280215;REAC:R-HSA-2559582
