# Supplementary material for: Replicative Senescence in Vascular Smooth Muscle Cells: PURPL and NEAT1 Long Non-Coding RNAs as New Senescence-Associated Biomarkers
Source: Preprints.org preprint supplement (doi:10.20944/preprints202307.1589.v1), 2023-07-24
Supplement: Supplementary file 3 [file Suppl Table_2 final.xlsx]

## Sheet: Foglio1
Suppl Table 2: Primers used for q-RT-PCR experiments (protein-coding genes and lncRNAs)
Gene	ENSG ID	FWD	RVS
CDKN1A (p21)	ENSG00000124762	5’- TGGAGACTCTCAGGGTCGAAA- 3’	5’- GGCGTTTGGAGTGGTAGAAATC -3’
CDKN2A (p16)	ENSG00000147889	5’- CATAGATGCCGCGGAAGGT- 3’	5’- TCTAAGTTTCCCGAGGTTTCTCA- 3’
CDKN2B-AS	ENSG00000240498	5’- AAGACTTCTGTTTTCTGGCCACC -3’	5’- GGAAAGGATTCCAGCACACCT -3’
CXCL8 (IL8)	ENSG00000169429	5’- ATACTCCAAACCTTTCCACCC- 3’	5’- TCTGCACCCAGTTTCCTTG- 3’
CYC1	ENSG00000179091	5’-TAGAGTTTGACGATGGCACCC- 3’	5’-CGTTTTCGATGGTCGTGCTC- 3’
EIF4A2	ENSG00000156976	5’- GGTCAGGGTCAAGTCGTGTT- 3’	5’- CCCCCTCTGCCAATTCTGTG- 3’
GAS5	ENSG00000234741	5’- CTCAAGCCATTGGCACACAGG - 3’	5’- CGTTACCAGGAGCAGAACCA - 3’
GLB1	ENSG00000170266	5’- AATCAAGACCGAAGCAGTGGC- 3’	5’- GGGTGAGTTGGCCCCATTCC - 3’
H19	ENSG00000130600	5’ -ACGGAGTCGGCACACTATGG-3’	5’- CAGGCTTGAGCTGGGTAGCA-3’
HMGB1	ENSG00000189403	5’- AGAAGCCGAGAGGCAAAATGT-3’	5’- ATAACGGGCCTTGTCCGCTT -3’
HOTAIR	ENSG00000228630	5’- GGCAAGACGGGCACTCACAG - 3’	5’- CTGGGCGTTCATGTGGCGAG - 3’
IL1B	ENSG00000125538	5’- CCAGGGACAGGATATGGAGCA- 3’	5’- TTCAACACGCAGGACAGGTACAG- 3’
IL6	ENSG00000136244	5’-CCACTCACCTCTTCAGAACG -3’	5’- CATCTTTGGAAGGTTCAGGTTG -3’
LMNB1	ENSG00000113368	5’- GAACCAGAACTCGTGGGGCA -3’	5’ -ATGCTCTTGGGGTTCCCTGC- 3’
MALAT1	ENSG00000251562	5’- AGGGAAAGCGAGTGGTTGGT - 3’	5’- GAAATCGGCCTACGTCCCCA - 3’
MEG3	ENSG00000171889	5’- TCCCACCCCTCTTGCTTGTC - 3’	5’- CCATCCGCAGTTCTTCAGCC - 3’
MIR31HG	ENSG00000149968	5’- CGCTTCTGTCCTCCTACTCG -3’	5’- ACAAGCAGACCCTTGGAATG -3’
MMP3	ENSG00000149968	5’- TGTCCCGTTTCCATCTCTCTC- 3’	5’- TGGTGATGTCTCAGGTTCCAG- 3’
NEAT1	ENSG00000245532	5’- CGGAGGTGAGGGGTGGTCTG -3’	5’- GCAGTCCCCGCCTGTCAAAC -3’
PCNA	ENSG00000132646	5’- AACCTGCAGCGCATGGACTC- 3’	5’- TCATTGCCGGCGCATTTTAG- 3’
PURPL	ENSG00000250337	5’- ATCCGGCTATTTTGGAGATTGA-3’	5’- AGCCTGGACCACAGAACAAG-3’
RPSA	ENSG00000168028	5’- CAACAACAAGGGAGCTCACTC- 3’	5’- CTTCTCAGCAGCAGCCTGCT- 3’
RRAD	ENSG00000166592	5’- CGAGAGCGTTTACAAGGTGCTG -3’	5’- ATGGAGCGATCATAGGTGTGCC -3’
SBLC	NA	5’- GATGACGAATGCACCCCCAT -3’	5’- GACTGGAAGGACGGCTATGC -3’
SNHG12	ENSG00000197989	5’- CATTCCCGGTGTCGACTTAC - 3’	5’- CAGTCCGAAGCGAGAGAAGG - 3’
TP53	ENSG00000141510	5’- GGCCCCTCCTCAGCATCTTATC - 3’	5’- GGCACAAACACGCACCTCAA - 3’
TUG1	ENSG00000253352	5’- AGCATCTCACAAGGCTGCAC - 3’	5’- CAAAGGGCTTCATGGCCACA - 3’
