# Supplementary material for: Replicative Senescence in Vascular Smooth Muscle Cells: PURPL and NEAT1 Long Non-Coding RNAs as New Senescence-Associated Biomarkers
Source: Preprints.org preprint supplement (doi:10.20944/preprints202307.1589.v1), 2023-07-24
Supplement: Supplementary file 4 [file Suppl Tables_3 final.xlsx]

## Sheet: Foglio1
Suppl Table 3: Antibodies used for Western blot experiments
PRIMARY ANTIBODIES	COMPANY	ID NUMBER	RRID	DILUTION
GAPDH	Abcam	AB181603	AB_2687666	1; 10000
IL1-b	Abcam	AB2105	AB_302842	1; 2000
LMNB1	Abcam	AB16048	AB_443298	1; 1000
MMP3	Abcam	AB52915	AB_881243	1; 5000
p21 Waf1/Cip1	Cell Signaling	2947	AB_823586	1; 1000
p53	Sigma-Aldrich	P6874	AB_1079545	1; 500
PCNA	Agilent	M0879	AB_2160651	1; 500
RRAD	Thermo Fisher	PA5-36460	AB_2553535	1; 500
Tubulin	Sigma-Aldrich	T6199	AB_477583	1; 1500
SECONDARY ANTIBODIES
Alexa Fluor 488-conjugated	Invitrogen	A48276	AB_2896339	1; 500
Goat anti-rabbit	Abcam	AB205718	AB_2819160	1; 5000
Goat anti-mouse	Abcam	AB205719	AB_2755049	1; 5000
RRID = Research Resources Identifiers
